# Supplementary material
Source: Springer Nature journal article supplement (https://www.springermedizin.de/resource/supplementary/12967_2009_353_MOESM6_ESM.pdf/9576286)

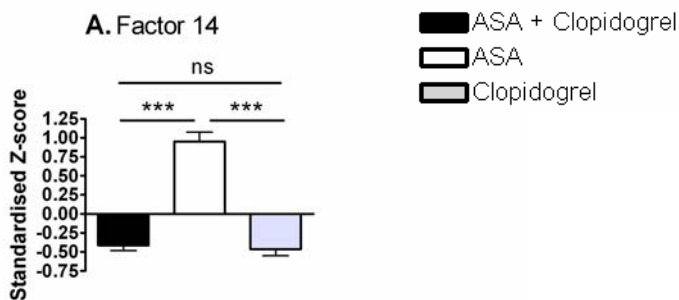

**A. ADP 0.1  $\mu\text{mol/L}$**

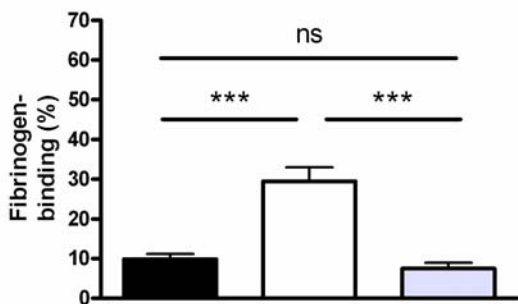

**B. Factor 15**

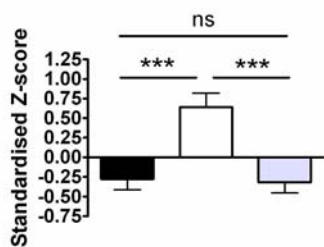

**B. SFLLRN 5.3  $\mu\text{mol/L}$**

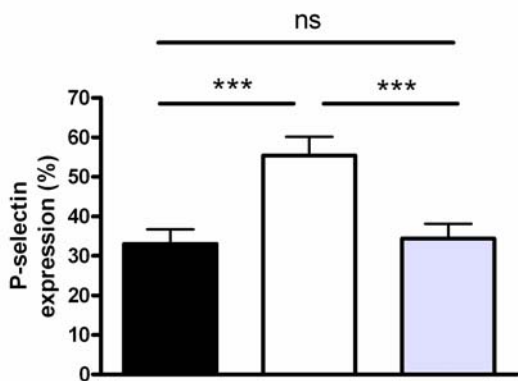

Supplement: MOESM6 [file 9576286]
